# Supplementary material for: Effect of Training Load on Post-Exercise Cardiac Troponin T Elevations in Young Soccer Players
Source: MDPI journal article supplement (doi:10.3390/ijerph16234853), 2019-12-02
Supplement: s1 [file s1]

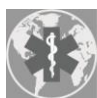

**Table 1.** Model coefficients.

| Variable                                                         | Parameter                                        | Coefficient            | MPE     |
|------------------------------------------------------------------|--------------------------------------------------|------------------------|---------|
| <b>Time</b><br>R <sup>2</sup> = 64.4 (52.5–74.7)                 | $\beta_0$ (Intercept)                            | 0.48 (0.26–0.72)       |         |
|                                                                  | $\beta_1 = \text{hs-cTnT}_{0h}$                  | 0.17 (−0.11 to 0.44)   | 84.4%   |
|                                                                  | $\beta_2 = \text{hs-cTnT}_{3h}$                  | 1.4 (1.12–1.68)        | 100% *  |
| <b>Age (Years)</b><br>R <sup>2</sup> = 68.7 (59.4–78.5)          | $\beta_0$ (Intercept)                            | 0.48 (0.26–0.7)        |         |
|                                                                  | $\beta_1 = \text{Post}$                          | 1.4 (1.11–1.68)        | 100% *  |
|                                                                  | $\beta_2 = \text{Age}$                           | 0.06 (−0.18 to 0.27)   | 65.6%   |
|                                                                  | $\beta_3 = \text{Post} \times \text{Age}$        | 0.42 (0.13–0.74)       | 98.7% * |
| <b>Tanner Stage</b><br>R <sup>2</sup> = 63.8 (52.1–74.7)         | $\beta_0$ (Intercept)                            | 0.48 (0.25–0.73)       |         |
|                                                                  | $\beta_1 = \text{Post}$                          | 1.39 (1.08–1.74)       | 100% *  |
|                                                                  | $\beta_2 = \text{Tanner}$                        | 0.07 (−0.16 to 0.34)   | 67.9%   |
|                                                                  | $\beta_3 = \text{Post} \times \text{Tanner}$     | 0.28 (−0.04 to 0.62)   | 91.8% * |
| <b>Experience (Years)</b><br>R <sup>2</sup> = 72.9 (64.3–81.5)   | $\beta_0$ (Intercept)                            | 0.48 (0.27–0.68)       |         |
|                                                                  | $\beta_1 = \text{Post}$                          | 1.4 (1.14–1.67)        | 100% *  |
|                                                                  | $\beta_2 = \text{Experience}$                    | 0.05 (−0.13 to 0.28)   | 66.8%   |
|                                                                  | $\beta_3 = \text{Post} \times \text{Experience}$ | 0.5 (0.23–0.78)        | 99.8% * |
| <b>BMI (kg/m<sup>2</sup>)</b><br>R <sup>2</sup> = 59.8 (46.2–72) | $\beta_0$ (Intercept)                            | 0.48 (0.22–0.73)       |         |
|                                                                  | $\beta_1 = \text{Post}$                          | 1.39 (1.08–1.74)       | 100% *  |
|                                                                  | $\beta_2 = \text{BMI}$                           | 0.09 (−0.17 to 0.35)   | 73%     |
|                                                                  | $\beta_3 = \text{Post} \times \text{BMI}$        | 0.03 (−0.3 to 0.37)    | 56.2%   |
| <b>HR Max (bpm)</b><br>R <sup>2</sup> = 69.1 (59.3–79)           | $\beta_0$ (Intercept)                            | 0.48 (0.26–0.7)        |         |
|                                                                  | $\beta_1 = \text{Post}$                          | 1.4 (1.13–1.7)         | 100% *  |
|                                                                  | $\beta_2 = \text{HR max}$                        | −0.05 (−0.28 to 0.17)  | 64.3%   |
|                                                                  | $\beta_3 = \text{Post} \times \text{HR max}$     | −0.43 (−0.71 to −0.11) | 99% *   |
| <b>HR Aver (bpm)</b><br>R <sup>2</sup> = 57.6 (42.2–71)          | $\beta_0$ (Intercept)                            | 0.49 (0.21–0.78)       |         |
|                                                                  | $\beta_1 = \text{Post}$                          | 1.34 (0.95–1.69)       | 100% *  |
|                                                                  | $\beta_2 = \text{HR aver}$                       | 0.07 (−0.2 to 0.36)    | 65.6%   |
|                                                                  | $\beta_3 = \text{Post} \times \text{HR aver}$    | 0.09 (−0.31 to 0.45)   | 66.4%   |
| <b>rHR Aver (%)</b><br>R <sup>2</sup> = 58.9 (44.4–72.3)         | $\beta_0$ (Intercept)                            | 0.49 (0.23–0.76)       |         |
|                                                                  | $\beta_1 = \text{Post}$                          | 1.34 (0.98–1.68)       | 100% *  |
|                                                                  | $\beta_2 = \text{rHR aver}$                      | 0.07 (−0.19 to 0.36)   | 66.6%   |
|                                                                  | $\beta_3 = \text{Post} \times \text{rHR aver}$   | 0.17 (−0.2 to 0.52)    | 78.4%   |
| <b>HR Peak (bpm)</b><br>R <sup>2</sup> = 56.6 (41.7–70.5)        | $\beta_0$ (Intercept)                            | 0.49 (0.2–0.76)        |         |
|                                                                  | $\beta_1 = \text{Post}$                          | 1.34 (0.99–1.71)       | 100% *  |
|                                                                  | $\beta_2 = \text{HR peak}$                       | 0.05 (−0.24 to 0.35)   | 60.4%   |
|                                                                  | $\beta_3 = \text{Post} \times \text{HR peak}$    | −0.08 (−0.47 to 0.3)   | 64.8%   |
| <b>rHR Peak (%)</b><br>R <sup>2</sup> = 57 (42–71.6)             | $\beta_0$ (Intercept)                            | 0.49 (0.22–0.77)       |         |
|                                                                  | $\beta_1 = \text{Post}$                          | 1.34 (0.98–1.7)        | 100% *  |
|                                                                  | $\beta_2 = \text{rHR peak}$                      | 0.06 (−0.22 to 0.37)   | 63%     |
|                                                                  | $\beta_3 = \text{Post} \times \text{rHR peak}$   | 0.03 (−0.38 to 0.4)    | 54%     |
| <b>Time HR-Z5 (min)</b><br>R <sup>2</sup> = 60.7 (45.6–73.7)     | $\beta_0$ (Intercept)                            | 0.5 (0.23–0.78)        |         |
|                                                                  | $\beta_1 = \text{Post}$                          | 1.3 (0.97–1.68)        | 100% *  |
|                                                                  | $\beta_2 = \text{Time HR-Z5}$                    | 0.04 (−0.24 to 0.33)   | 60%     |
|                                                                  | $\beta_3 = \text{Post} \times \text{Time HR-Z5}$ | 0.31 (−0.04 to 0.67)   | 92.5% * |
| <b>RPE (UA)</b><br>R <sup>2</sup> = 66 (53.8–76)                 | $\beta_0$ (Intercept)                            | 0.48 (0.27–0.72)       |         |
|                                                                  | $\beta_1 = \text{Post}$                          | 1.39 (1.1–1.72)        | 100% *  |
|                                                                  | $\beta_2 = \text{RPE}$                           | 0.07 (−0.17 to 0.3)    | 67.1%   |
|                                                                  | $\beta_3 = \text{Post} \times \text{RPE}$        | 0.34 (0.02–0.66)       | 96.8% * |
| <b>Dist Abs (m)</b><br>R <sup>2</sup> = 70.1 (58.8–80.8)         | $\beta_0$ (Intercept)                            | 0.49 (0.24–0.72)       |         |
|                                                                  | $\beta_1 = \text{Post}$                          | 1.34 (1.01–1.63)       | 100% *  |
|                                                                  | $\beta_2 = \text{Dist abs}$                      | 0.01 (−0.24 to 0.24)   | 53%     |

|                            |                                                  |                       |         |
|----------------------------|--------------------------------------------------|-----------------------|---------|
|                            | $\beta_3 = \text{Post} \times \text{Dist abs}$   | 0.52 (0.22–0.85)      | 99.4% * |
| <b>Dist Rel (m/min)</b>    | $\beta_0$ (Intercept)                            | 0.49 (0.26–0.72)      |         |
|                            | $\beta_1 = \text{Post}$                          | 1.34 (1.06–1.67)      | 100% *  |
| $R^2 = 69.8$ (58.7–80.1)   | $\beta_2 = \text{Dist rel}$                      | 0.01 (–0.23 to 0.24)  | 54%     |
|                            | $\beta_3 = \text{Post} \times \text{Dist rel}$   | 0.52 (0.21–0.83)      | 99.6% * |
| <b>Speed Aver (km/h)</b>   | $\beta_0$ (Intercept)                            | 0.49 (0.24–0.71)      |         |
|                            | $\beta_1 = \text{Post}$                          | 1.34 (1.05–1.63)      | 100% *  |
| $R^2 = 71.7$ (61.3–81.5)   | $\beta_2 = \text{Speed aver}$                    | 0.02 (–0.23 to 0.25)  | 54.6%   |
|                            | $\beta_3 = \text{Post} \times \text{Speed aver}$ | 0.55 (0.24–0.85)      | 99.8% * |
| <b>Speed Peak (km/h)</b>   | $\beta_0$ (Intercept)                            | 0.5 (0.22–0.77)       |         |
|                            | $\beta_1 = \text{Post}$                          | 1.34 (0.98–1.66)      | 100% *  |
| $R^2 = 60$ (45.6–73.7)     | $\beta_2 = \text{Speed peak}$                    | –0.05 (–0.32 to 0.24) | 60.3%   |
|                            | $\beta_3 = \text{Post} \times \text{Speed peak}$ | 0.29 (–0.06 to 0.66)  | 90.3% * |
| <b>Time Speed-Z4 (min)</b> | $\beta_0$ (Intercept)                            | 0.49 (0.22–0.77)      |         |
|                            | $\beta_1 = \text{Post}$                          | 1.34 (1–1.68)         | 100% *  |
| $R^2 = 60.2$ (45–73.1)     | $\beta_2 = \text{Time SP-Z4}$                    | –0.04 (–0.32 to 0.23) | 59.6%   |
|                            | $\beta_3 = \text{Post} \times \text{Time SP-Z4}$ | 0.29 (–0.07 to 0.64)  | 90.4% * |
| <b>Dist Speed-Z4 (m)</b>   | $\beta_0$ (Intercept)                            | 0.49 (0.21–0.74)      |         |
|                            | $\beta_1 = \text{Post}$                          | 1.34 (1.02–1.71)      | 100% *  |
| $R^2 = 60.4$ (46.6–74.3)   | $\beta_2 = \text{Dist SP-Z4}$                    | –0.04 (–0.32 to 0.24) | 59%     |
|                            | $\beta_3 = \text{Post} \times \text{Dist SP-Z4}$ | 0.3 (–0.06 to 0.64)   | 90.5% * |
| <b>Edwards' TL (UA)</b>    | $\beta_0$ (Intercept)                            | 0.49 (0.22–0.78)      |         |
|                            | $\beta_1 = \text{Post}$                          | 1.34 (1–1.71)         | 100% *  |
| $R^2 = 58.1$ (42.9–71)     | $\beta_2 = \text{TL}$                            | 0.06 (–0.21 to 0.35)  | 63.7%   |
|                            | $\beta_3 = \text{Post} \times \text{TL}$         | 0.13 (–0.25 to 0.49)  | 72%     |
| <b>Session RPE (UA)</b>    | $\beta_0$ (Intercept)                            | 0.48 (0.25–0.71)      |         |
|                            | $\beta_1 = \text{Post}$                          | 1.39 (1.09–1.7)       | 100% *  |
| $R^2 = 65.8$ (54.8–76.7)   | $\beta_2 = \text{s-RPE}$                         | 0.07 (–0.18 to 0.31)  | 68.2%   |
|                            | $\beta_3 = \text{Post} \times \text{s-RPE}$      | 0.34 (0.02–0.67)      | 96.6% * |
